# Supplementary material for: Proteomic Analysis Reveals Key Proteins in Extracellular Vesicles Cargo Associated with Idiopathic Pulmonary Fibrosis In Vitro
Source: MDPI journal article supplement (doi:10.3390/biomedicines9081058), 2021-08-20
Supplement: s1 [file s1]

# Proteomic analysis reveals key proteins in extracellular vesicles cargo associated with idiopathic pulmonary fibrosis in vitro

Juan Manuel Velázquez-Enríquez<sup>1</sup>, Jovito Cesar Santos-Álvarez<sup>1</sup>, Alma Aurora Ramírez-Hernández<sup>1</sup>, Edilburga Reyes-Jiménez<sup>1</sup>, Armando López-Martínez<sup>1</sup>, Socorro Pina-Canseco<sup>2</sup>, Sergio Roberto Aguilar-Ruiz<sup>1</sup>, María de los Ángeles Romero-Tlalolini<sup>5</sup>, Luis Castro-Sánchez<sup>3</sup>, Jaime Arellanes-Robledo<sup>4</sup>, Verónica Rocío Vásquez-Garzón<sup>5</sup> and Rafael Baltiérrez -Hoyos<sup>5\*</sup>

<sup>1</sup> Facultad de Medicina y Cirugía, Universidad Autónoma Benito Juárez de Oaxaca, 68120, Oaxaca, México; juanmanuelvela\_enriquez@live.com (J.M.V.-E.); jovitocesarsa@hotmail.com (J.C.S.-Á.); aramih\_09@hotmail.com (A.A.R.-H.); edilreyesjimnez@yahoo.com.mx (E.R.-J.); armandolopez37@gmail.com (A.L.-M.); sar\_cinvestav@hotmail.com (S.R.A.-R.)

<sup>2</sup> Centro de Investigación, Facultad de Medicina, UNAM-UABJO, 68120, Oaxaca, Oax, México; socopina12@hotmail.com (S.P.-C.)

<sup>3</sup> CONACYT-Facultad de Medicina y Cirugía, Universidad Autónoma Benito Juárez de Oaxaca, 68120 Oaxaca, México; mdlaromerotl@conacyt.mx (M.Á.R.-T.); veronicavasgar@gmail.com (V.R.V.-G.)

<sup>4</sup> CONACYT-Universidad de Colima, Centro Universitario de Investigaciones Biomédicas "CUIB", Universidad de Colima, 28045 Colima, Col, México; luis\_castro@uclm.mx (L.C.-S.)

<sup>5</sup> CONACYT-Instituto Nacional de Medicina Genómica, 14610 Ciudad de México, México; jarellanes@inmegen.gob.mx (J.A.-R.)

\* Correspondence: rbaltierrez@hotmail.com (R.B.-H.)

## Supplementary Figures

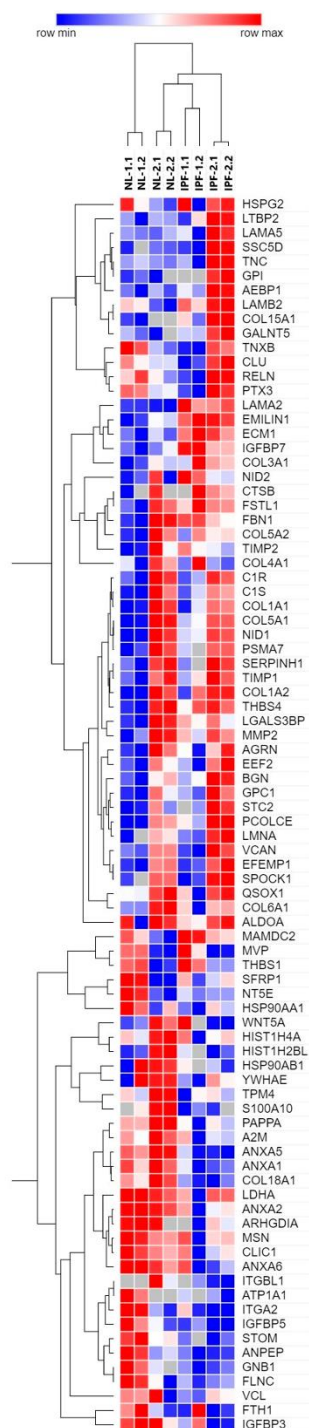

Figure S1: Heat map showing differentially expressed proteins in EVs cargo isolate from cell lines bearing both IPF and healthy phenotype. Protein intensities were log2 transformed and Z-scored to be normalized between groups. Up-regulated and down-regulated proteins are depicted in red and blue colors, respectively. IPF, idiopathic pulmonary fibrosis; NL, normal lung.

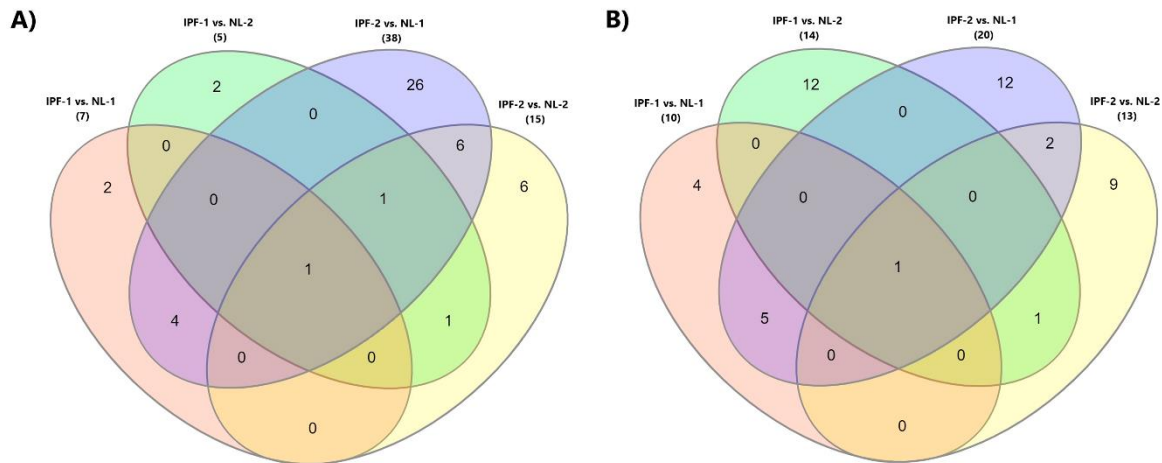

Figure S2: Distribution of differentially expressed proteins. (A) Venn diagram showing the distribution of up-regulated proteins in the comparison groups. (B) Venn diagram showing the distribution of down-regulated proteins in the comparison groups. IPF, idiopathic pulmonary fibrosis; NL, normal lung.

### Supplementary Tables

Figure S1: Heat map showing differentially expressed proteins in EVs cargo isolated from cell lines bearing both IPF and healthy phenotype.

Figure S2: Distribution of differentially expressed proteins.

Table S1: Proteins identified by proteomic analysis using LFQ intensity value  $\neq 0$  in at least one biological replicate.

Table S2: Proteins identified by proteomic analysis using LFQ intensity value  $\neq 0$  and MS/MS (spectral) count  $\geq 2$  in at least one biological replicate.

Table S3: Proteins identified in a single EVs group.

Table S4: Proteins identified as differentially expressed (fold change  $\geq 1$   $y \leq -1$  and  $p < 0.05$ ) in IPF-1 vs. NL-1 comparison.

Table S5: Proteins identified as differentially expressed (fold change  $\geq 1$   $y \leq -1$  and  $p < 0.05$ ) in IPF-1 vs. NL-2 comparison.

Table S6: Proteins identified as differentially expressed (fold change  $\geq 1$   $y \leq -1$  and  $p < 0.05$ ) in IPF-2 vs. NL-1 comparison.

Table S7: Proteins identified as differentially expressed (fold change  $\geq 1$   $y \leq -1$  and  $p < 0.05$ ) in IPF-2 vs. NL-2 comparison.

Table S8: Proteins identified as differentially expressed (fold change  $\geq 1$   $y \leq -1$  and  $p < 0.05$ ) in two or more comparisons.

Table S9: GO enrichment (biological process) for up-regulated proteins in the pairwise comparisons using GeneCodis.

Table S10: GO enrichment (biological process) for down-regulated proteins in the pairwise comparisons GeneCodis.

Table S11: GO enrichment (molecular function) for up-regulated proteins in the pairwise comparisons using GeneCodis.

Table S12: GO enrichment (molecular function) for down-regulated proteins in the pairwise comparisons using GeneCodis.

Table S13: GO enrichment (cellular component) for up-regulated proteins in the pairwise comparisons using GeneCodis.

Table S14: GO enrichment (cellular component) for down-regulated proteins in the pairwise comparisons using GeneCodis

Table S15: Enrichment pathways (KEGG) for up-regulated proteins in the pairwise comparisons using GeneCodis.

Table S16: Enrichment pathways (KEGG) for down-regulated proteins in the pairwise comparisons using GeneCodis.
